# Supplementary material for: Mechanism of sweetening effect of 2-methylbutyric acid and other 9 acids from sweet orange investigated by sensory evaluation, electronic tongue, and molecular simulation
Source: Research Square preprint supplement (doi:10.21203/rs.3.rs-5056730/v1), 2024-11-02
Supplement: Supplementary file 1 [file bae01b2bd491bf3583ec86b3.docx]

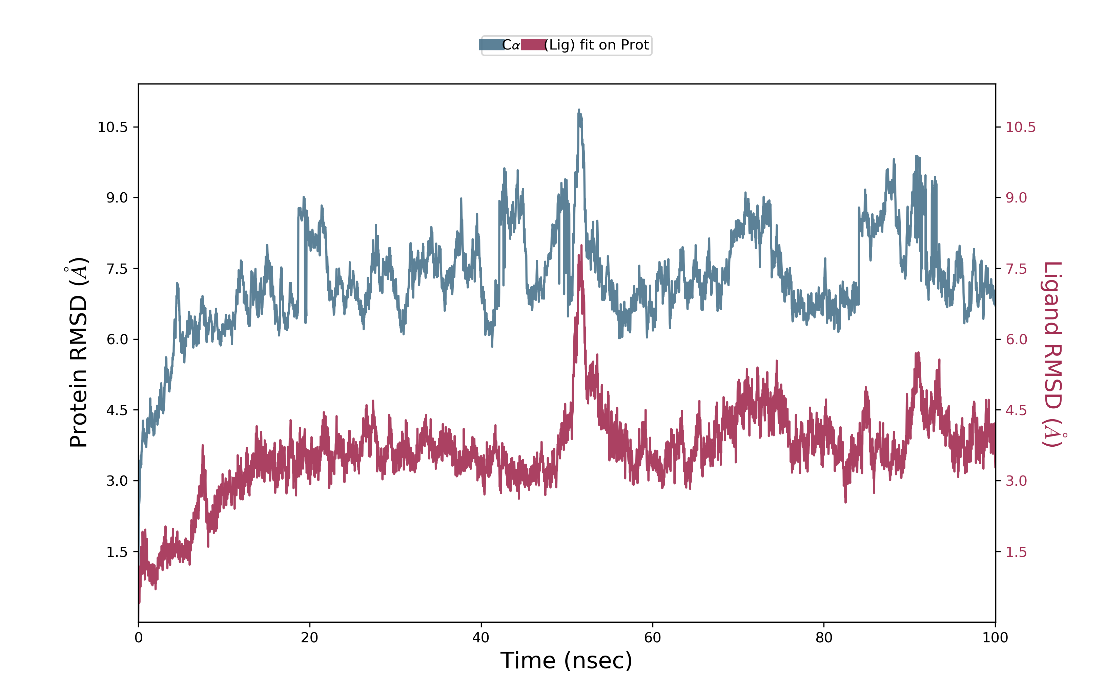


Figure S1 RMSD of sucrose and T1R2/T1R3


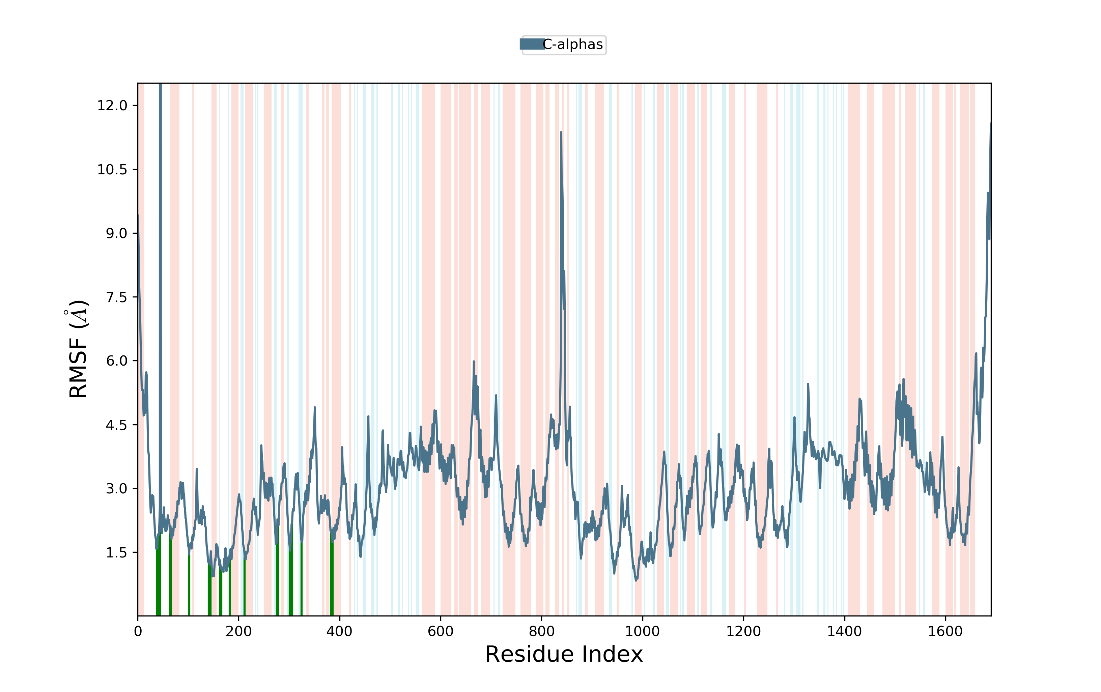


Figure S2 RMSF of sucrose and T1R2/T1R3


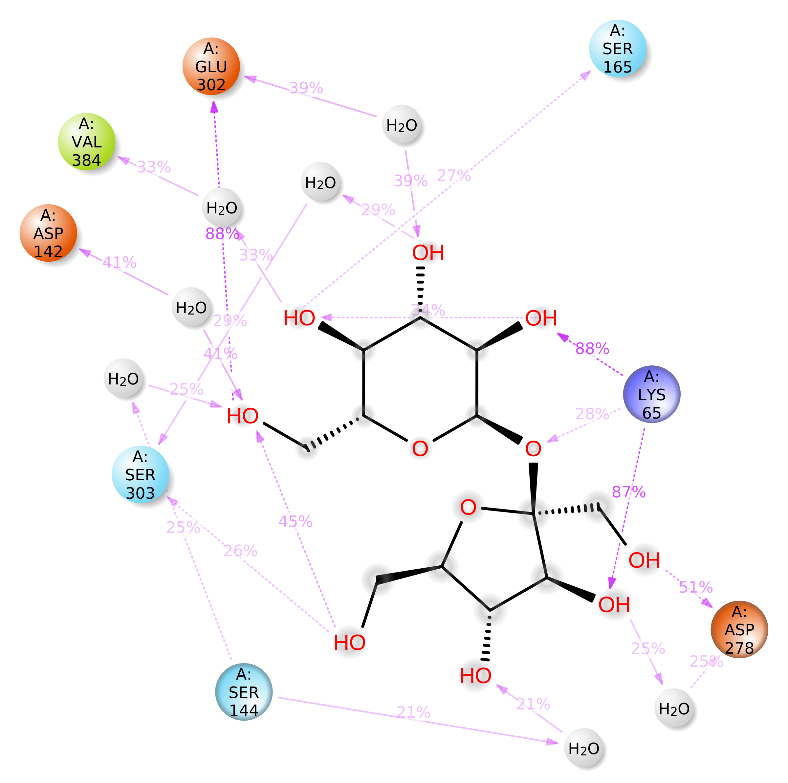


Figure S3 interaction between sucrose and T1R2/T1R3 that occurs over 20.0% of the simulation time (over 20ns of interaction time in 100ns) .
